# Supplementary material for: Branched carbon-encapsulated MnS core/shell nanochains prepared via oriented attachment for lithium-ion storage
Source: Royal Society of Chemistry journal article supplement (doi:10.1039/c6ta04441g), 2016-01-01
Supplement: c6ta04441g1.pdf [file c6ta04441g1.pdf]

## Supporting Information

### Branched Carbon-Encapsulated MnS Core/Shell Nanochains

### Prepared Via Oriented Attachment for Lithium-Ion Storage

Jinyu Ning,<sup>a</sup> Di Zhang,<sup>a</sup> Huaihe Song,<sup>a,b\*</sup> Xiaohong Chen<sup>a</sup> and Jisheng Zhou<sup>a,b\*</sup>

<sup>a</sup> State Key Laboratory of Chemical Resource Engineering, Beijing Key Laboratory of Electrochemical Process and Technology for Materials, Beijing University of Chemical Technology, Beijing 100029, P. R. China

<sup>b</sup> Changzhou Institute of Advanced Materials, Beijing University of Chemical Technology, Jiangsu, P. R. China.

#### Supporting Data:

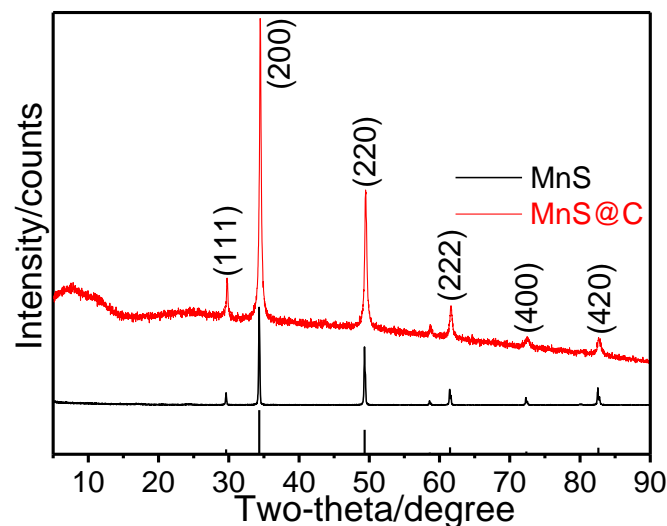

Fig. S1: XRD patterns of the pure MnS obtained from  $Mn_2O_3$  and MnS@C nanochains prepared at 500°C for 3h using in a manganocene/S molar ratios of 1:4.

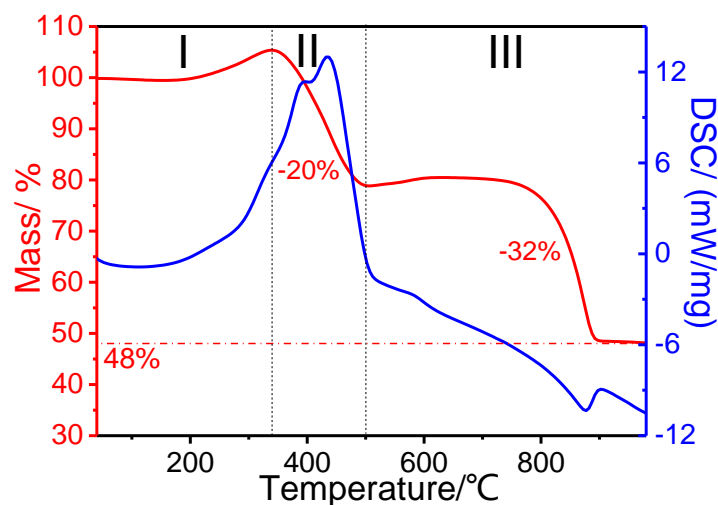

Fig. S2: TG pattern of MnS@C nanochains measured at air atmosphere. (Based on the mass content of residues (MnO), it can be calculated the mass content of MnS is ca. 59%)

The TG pattern can be divided into three stages based on the mass changes. At stage I, mass keeps constant from room temperature to 200 °C. After 200 °C, mass increases gradually, and at ca. 350 °C, increasing of mass can be up to maximum value of ca. 105%. The mass increase at the stage I maybe involve the process of MnS to MnSO<sub>4</sub> according to previous report<sup>1</sup>. At stage II from 350 to ca. 500 °C, there is a drastic drop on the TG line, which should be attributed to the oxidation of carbon into CO<sub>2</sub>/CO, so there are two obvious exothermal peaks on the corresponding temperature range of DSC line. At the stage III, when temperature is up to ca. 770 °C there is also a drastic drop on the TG line, which should be corresponding to decomposition of MnSO<sub>4</sub> into MnO.

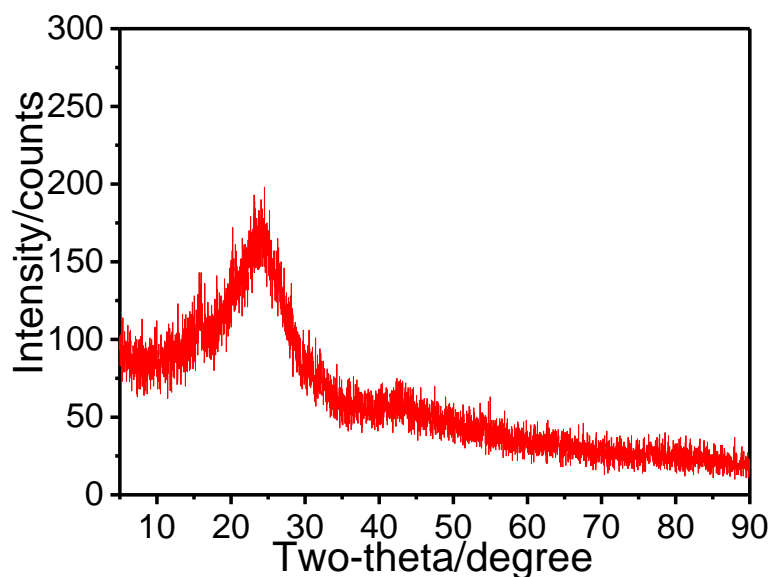

Fig. S3: the XRD pattern of the hollow carbon chains obtained after removing MnS in MnS@C nanochains by HCl.

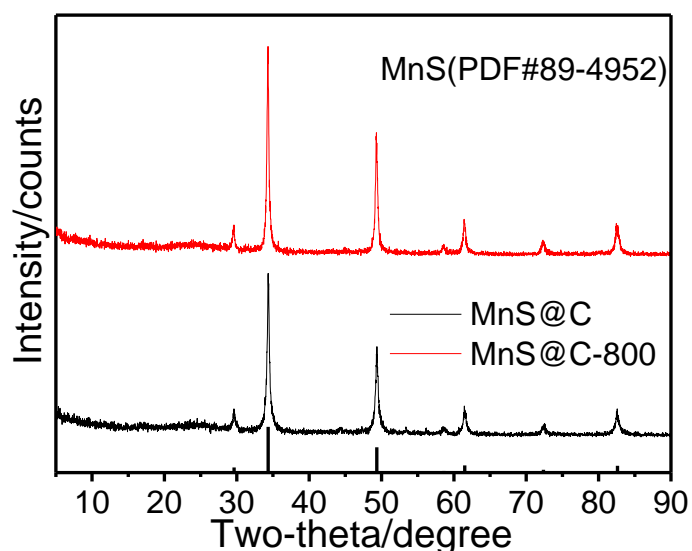

Fig. S4: XRD patterns of the products obtained before and after annealing at 800 °C for 2h.

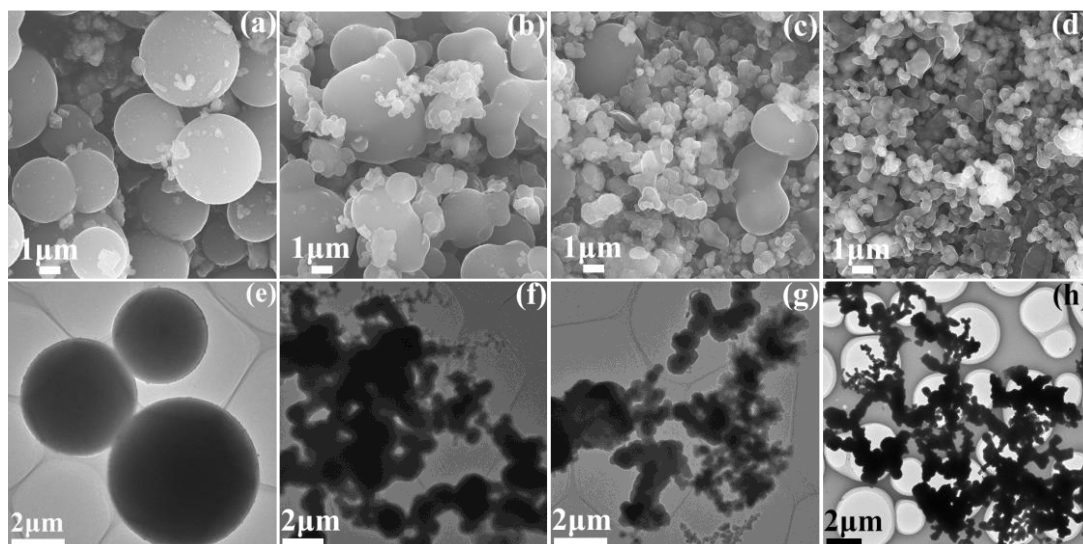

Fig. S5 the SEM images of the products prepared at 500 °C for 2h using (a) pure manganocene without S, and the mixtures of manganocene and S in various molar ratios of manganocene/S at (b)1:1, (c)1:2 and (d)1:4; (e-h) the corresponding TEM images.

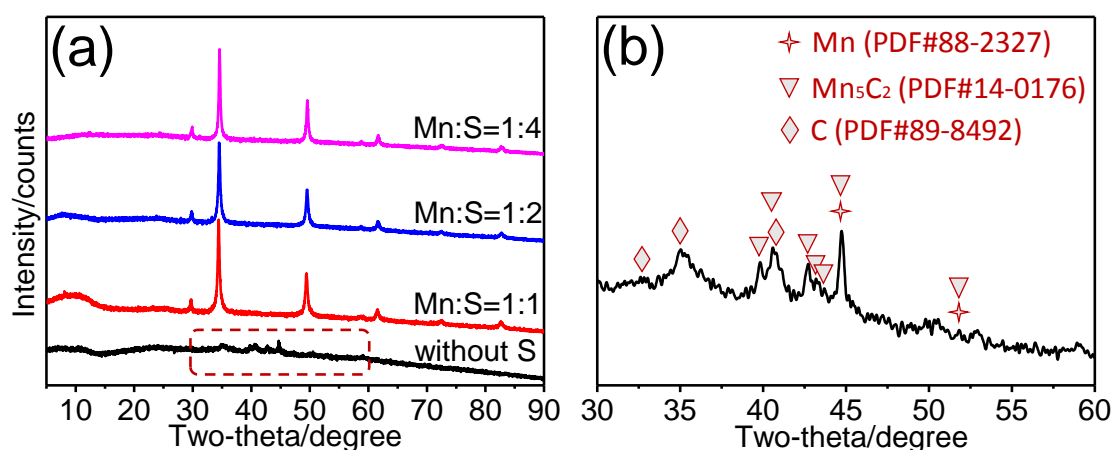

Fig. S6: (a) the XRD patterns of the products prepared at 500 °C for 2h using pure manganocene without S, and the mixtures of manganocene and S in various molar ratios of manganocene/S at 1:1, 1:2 and 1:4; (b) the enlarged XRD patterns of the cycled area in image (a).

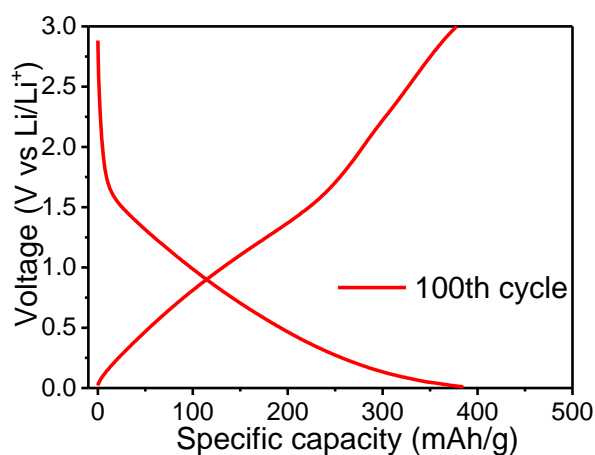

Fig. S7: the 100th charge/discharge curves of MnS@C treated by hydrochloric acid for 4 h at 90 °C at a current density of 50 mA g<sup>-1</sup>.

The stable capacity of the carbon shell is ca. 380 mA h g<sup>-1</sup> after 100 cycles (Fig. S7). So the specific capacity from the carbon shell is ca. 156 mA h g<sup>-1</sup> (calculated by 380 x 41 %), while the capacity contribution of MnS in MnS@C-800 is ca. 344 mA h g<sup>-1</sup> (calculated by 500 - 156). Thus, the actual specific capacity of MnS in will deliver 583 mA h g<sup>-1</sup> (calculated by 344 ÷ 59 %).

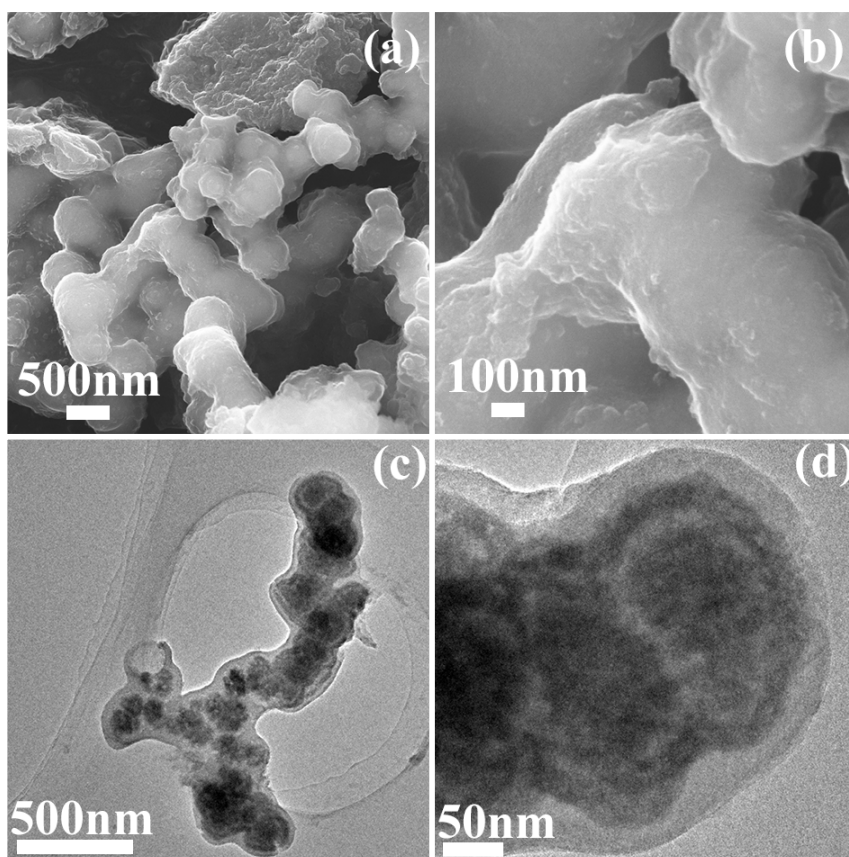

Fig. S8: (a, b) the SEM images and (c, d) TEM images of MnS@C-800 electrode plate after charge/discharge of 50 cycles at the current density of 50 mA/g.

Table 1. Fitting results of the EIS curves in Fig. 7d using the equivalent circuit.

| Sample    | R <sub>e</sub> (Ω) | R <sub>sf</sub> +R <sub>ct</sub> (Ω) |
|-----------|--------------------|--------------------------------------|
| MnS       | 1.02               | 60.91                                |
| MnS@C     | 0.80               | 29.45                                |
| MnS@C-800 | 1.37               | 16.44                                |

#### Reference

- 1 K. M. Jeon, J. S. Cho and Y. C. Kang, *J. Power Sources* 2015, **295**, 9-15.
